# Supplementary material
Source: PubMed Central journal article supplement (PMC1559839)
Supplement: rspb20053115s05.pdf [file rspb20053115s05.pdf]

# ELECTRONIC APPENDIX

This is the Electronic Appendix to the article

**Stable isotopes, beaks and predators:  
a new tool to study the trophic ecology of cephalopods,  
including giant and colossal squids**

by

Yves Cherel and Keith A. Hobson

*Proc. R. Soc. B* ([doi:10.1098/rspb.2005.3115](https://doi.org/10.1098/rspb.2005.3115))

Electronic appendices are refereed with the text; however, no attempt is made to impose a uniform editorial style on the electronic appendices.

Annex 1. Cephalopod species, predator species and locations, and the isotopic signature of cephalopod tissues.

| Study and species                      | Provenance            |               | Isotopic signature          |                 |                           |                           |               |                 |
|----------------------------------------|-----------------------|---------------|-----------------------------|-----------------|---------------------------|---------------------------|---------------|-----------------|
|                                        | Predator or bycatch   | Location      | Tissue                      | n               | $\delta^{15}\text{N}$ (‰) | $\delta^{13}\text{C}$ (‰) |               |                 |
| <b>CONTROL INDIVIDUALS</b>             |                       |               |                             |                 |                           |                           |               |                 |
| <i>Psychroteuthis glacialis</i>        | Emperor penguin       | Adélie Land   | Lower beaks                 | 10              | $7.1 \pm 1.1$             | $-24.9 \pm 0.3$           |               |                 |
|                                        |                       |               | Upper beaks                 | 10              | $6.8 \pm 1.1$             | $-24.9 \pm 0.3$           |               |                 |
|                                        |                       |               | Buccal masses               | 10              | $9.8 \pm 1.0$             | $-26.3 \pm 0.3$           |               |                 |
|                                        |                       |               | Arms                        | 10              | $10.9 \pm 1.1$            | $-25.5 \pm 0.3$           |               |                 |
| <b>ONTOGENIC CHANGES</b>               |                       |               |                             |                 |                           |                           |               |                 |
| <i>Moroteuthis ingens</i>              | Fishery bycatch       | Kerguelen     | Medium beaks                | 10              | $4.1 \pm 0.8$             | $-19.5 \pm 0.5$           |               |                 |
|                                        |                       |               | Large beaks                 | 10              | $5.9 \pm 0.2$             | $-19.5 \pm 0.4$           |               |                 |
|                                        |                       |               | King penguin                | Crozet          | Medium beaks              | 10                        | $4.6 \pm 0.5$ | $-19.6 \pm 0.7$ |
|                                        |                       |               | Wandering albatross         | Crozet          | Large beaks               | 10                        | $6.1 \pm 0.2$ | $-20.0 \pm 0.4$ |
| <i>Kondakovia longimana</i>            | King penguin          | Crozet        | Small beaks                 | 9               | $1.5 \pm 1.0$             | $-21.1 \pm 0.8$           |               |                 |
|                                        |                       |               | Medium beaks                | 10              | $3.0 \pm 0.7$             | $-21.7 \pm 0.9$           |               |                 |
|                                        |                       |               | Wandering albatross         | Crozet          | Large beaks               | 10                        | $5.5 \pm 0.5$ | $-23.1 \pm 1.1$ |
| <i>Kondakovia longimana</i>            | Wandering albatross   | Crozet        | Lower beak rostrums         | 10              | $5.3 \pm 0.6$             | $-23.2 \pm 1.5$           |               |                 |
|                                        |                       |               | Lateral walls               | 10              | $6.3 \pm 0.4$             | $-22.7 \pm 1.5$           |               |                 |
|                                        |                       |               | Wings                       | 10              | $6.7 \pm 0.6$             | $-22.5 \pm 1.4$           |               |                 |
|                                        |                       |               | <i>Benthoctopus thielei</i> | Fishery bycatch | Kerguelen                 | Lower beak rostrums       | 10            | $3.1 \pm 1.4$   |
| Lateral walls                          | 10                    | $5.1 \pm 0.9$ |                             |                 |                           | $-19.1 \pm 0.4$           |               |                 |
| Wings                                  | 10                    | $7.9 \pm 0.6$ |                             |                 |                           | $-18.7 \pm 0.4$           |               |                 |
| <b>COMMUNITY</b>                       |                       |               |                             |                 |                           |                           |               |                 |
| <i>Architeuthis dux</i>                | Sleeper shark         | Kerguelen     | Beaks                       | 4               | $6.7 \pm 1.3$             | $-17.4 \pm 0.3$           |               |                 |
| <i>Mesonychoteuthis hamiltoni</i>      | Sleeper shark         | Kerguelen     | Beaks                       | 10              | $11.4 \pm 0.8$            | $-19.7 \pm 1.4$           |               |                 |
| <i>Martialia hyadesi</i>               | King penguin          | Kerguelen     | Beaks                       | 10              | $2.8 \pm 0.6$             | $-20.2 \pm 0.5$           |               |                 |
| <i>Todarodes</i> sp.                   | Grey-headed albatross | Kerguelen     | Beaks                       | 10              | $3.4 \pm 0.8$             | $-19.7 \pm 0.4$           |               |                 |
| <i>Moroteuthis ingens</i>              | Patagonian toothfish  | Kerguelen     | Beaks                       | 5               | $5.3 \pm 1.1$             | $-19.5 \pm 0.7$           |               |                 |
| <i>Moroteuthis knipovitchi</i>         | Patagonian toothfish  | Kerguelen     | Beaks                       | 5               | $6.2 \pm 0.4$             | $-20.8 \pm 0.5$           |               |                 |
| <i>Moroteuthis</i> sp. B (Imber)       | Patagonian toothfish  | Kerguelen     | Beaks                       | 10              | $6.0 \pm 0.6$             | $-19.3 \pm 0.4$           |               |                 |
| <i>Kondakovia longimana</i>            | Patagonian toothfish  | Kerguelen     | Beaks                       | 3               | $4.3 \pm 1.1$             | $-20.4 \pm 0.5$           |               |                 |
| <i>Brachioteuthis linkovskyi</i>       | Patagonian toothfish  | Kerguelen     | Beaks                       | 10              | $5.3 \pm 0.8$             | $-20.0 \pm 0.5$           |               |                 |
| <i>Slosarczykovia circumantarctica</i> | Patagonian toothfish  | Kerguelen     | Beaks                       | 10              | $4.0 \pm 0.5$             | $-25.1 \pm 0.3$           |               |                 |
| <i>Gonatus antarcticus</i>             | Patagonian toothfish  | Kerguelen     | Beaks                       | 10              | $8.4 \pm 0.5$             | $-20.2 \pm 0.8$           |               |                 |
| <i>Taningia danae</i>                  | Patagonian toothfish  | Kerguelen     | Beaks                       | 3               | $6.7 \pm 0.1$             | $-20.0 \pm 0.4$           |               |                 |
| <i>Histioteuthis eltaninae</i>         | Patagonian toothfish  | Kerguelen     | Beaks                       | 10              | $5.5 \pm 0.7$             | $-20.0 \pm 0.4$           |               |                 |
| <i>Nototeuthis dimegacotyle</i>        | Patagonian toothfish  | Kerguelen     | Beaks                       | 10              | $6.6 \pm 0.4$             | $-19.5 \pm 0.7$           |               |                 |
| <i>Mastigoteuthis psychrophila</i>     | Patagonian toothfish  | Kerguelen     | Beaks                       | 10              | $8.0 \pm 0.6$             | $-20.3 \pm 0.6$           |               |                 |
| <i>Chiroteuthis veranyi</i>            | Patagonian toothfish  | Kerguelen     | Beaks                       | 10              | $8.0 \pm 1.3$             | $-19.2 \pm 0.6$           |               |                 |
| <i>Benthoctopus thielei</i>            | Fishery bycatch       | Kerguelen     | Beaks                       | 10              | $5.2 \pm 0.6$             | $-19.1 \pm 0.4$           |               |                 |
| <i>Graneledone gonzalezi</i>           | Fishery bycatch       | Kerguelen     | Beaks                       | 10              | $5.9 \pm 0.4$             | $-19.3 \pm 0.4$           |               |                 |
| <i>Psychroteuthis glacialis</i>        | Emperor penguin       | Adélie Land   | Beaks                       | 5               | $6.5 \pm 0.7$             | $-24.9 \pm 0.3$           |               |                 |
| Octopodidae sp.                        | Fishery               | Amsterdam     | Beaks                       | 4               | $9.7 \pm 0.6$             | $-16.5 \pm 0.4$           |               |                 |
